# Supplementary material for: Three-dimensional SiO2@Fe3O4 core/shell nanorod array/graphene architecture: synthesis and electromagnetic absorption properties
Source: Royal Society of Chemistry journal article supplement (doi:10.1039/c3nr04058e), 2013-01-01
Supplement: c3nr04058e.pdf [file c3nr04058e.pdf]

# Three-dimensional SiO<sub>2</sub>@Fe<sub>3</sub>O<sub>4</sub> core/shell nanorod array/graphene architectures: synthesis and electromagnetic absorption property

**Yulan Ren,<sup>a,b</sup> Chunling Zhu,<sup>c</sup> Shen Zhang,<sup>a</sup> Chunyan Li,<sup>a</sup> Yujin Chen,<sup>\*a</sup> Peng Gao,<sup>\*c</sup>  
Piaoping Yang,<sup>\*c</sup> and Qiuyun Ouyang<sup>a</sup>**

<sup>a</sup> Key Laboratory of In-Fiber Integrated Optics, Ministry of Education, and College of Science,  
Harbin Engineering University, Harbin 150001, China

<sup>b</sup> College of Chemistry and Chemical Engineering, Mudanjiang Normal University, Mudanjiang,  
157011, China

<sup>c</sup> College of Material Science and Chemical Engineering, Harbin Engineering University, Harbin  
150001, China

## Experimental section

**Materials.** Graphene used in this work were purchased from Nanjing XFNano Material Tech Co., Ltd, its thickness and surface area are about 0.8 nm and 500-600  $\text{m}^2\text{g}^{-1}$ , respectively. The oxygen content in the graphene is about 7wt%. The synthesized processes of graphene is described below. Typically, graphite oxide (GO) was prepared from natural graphite through a modified Hummers method.<sup>S1</sup> The GO was thermally treated at a high temperature under  $\text{N}_2$  flow, and then was reduced at 1200 °C under  $\text{H}_2$  atmosphere. All of other reagents were analytically pure, and purchased and used without further purification.

**Growth of  $\beta$ -FeOOH seeds on the graphene sheets.** 0.01 g of the graphene was dispersed into 300 mL water, and then 4.0 g of  $\text{Fe}(\text{NO}_3)_3 \cdot 9\text{H}_2\text{O}$  was added. The mixture above was kept at 50°C for 2 h under stirring. The precipitates were separated by centrifugation, washed with distilled water and absolute ethanol, dried under vacuum.

**Synthesis of 3D  $\beta$ -FeOOH nanorod array/G architecture.** 15 mg of the above product was dispersed in 35 mL of the solution containing 0.5 g of  $\text{FeCl}_3 \cdot 6\text{H}_2\text{O}$  and 1.0 g of sodium nitrate under stirring for 20 min. The mixture above was then transferred into a Teflon-lined stainless steel autoclave with a capacity of 50 mL for hydrothermal treatment at 60°C for 12 h. As the autoclave cooled to room temperature naturally, the precipitates were separated by centrifugation, washed with distilled water and absolute ethanol, and dried in air.

**Synthesis of 3D  $\text{SiO}_2$ @ $\beta$ -FeOOH nanorod array/G architecture.** 0.07 g of 3D  $\beta$ -FeOOH nanorod array/G architecture were dispersed in 80 mL 2-propanol, Under continuous mechanical stirring, 8 mL deionized water, 2 mL ammonia solution and 0.25 mL tetraethyl orthosilicate were consecutively added to the dispersed solution.

The reaction was kept for 4 h under stirring at room temperature. The precipitate was washed several times with deionized water and anhydrous ethanol, respectively, and then dried at room temperature.

**Fabrication of 3D SiO<sub>2</sub>@Fe<sub>3</sub>O<sub>4</sub> nanorod array/G architecture.** 3D SiO<sub>2</sub>@Fe<sub>3</sub>O<sub>4</sub> nanorod array/G architecture was fabricated by thermal treatment of the 3D SiO<sub>2</sub>@β-FeOOH nanorod array/G architectures at 280°C for 3 h in H<sub>2</sub>/Ar flow.

### **Structural Characterization.**

The morphology and size of the synthesized samples were characterized by scanning electron microscope (SEM) [HITACHI S-5200] and an FEI Tecnai-F20 transmission electron microscope (TEM) equipped with a Gatan imaging filter (GIF). The operating voltages of SEM and TEM are 5 and 200 kV, respectively. The crystal structure of the sample was determined by X-ray diffraction (XRD) [D/max 2550 V, Cu KR radiation]. X-ray photoelectron spectroscopy (XPS) measurements were carried out using a spectrometer with Mg Ka radiation (ESCALAB 250, Thermofisher Co.). The magnetic property of the product was measured by a vibrating sample magnetometer (VSM).

### **EM parameter measurements.**

The EM parameters of samples were measured by using the transmission/reflection coaxial line method. The measurement setup consisted of in an ANRITSU 37269D vector network analyzer with a synthesized sweep oscillator source and an S-parameter test set. The measured samples were prepared by uniformly mixing 20 wt% of the sample with a paraffin matrix. The mixture was then pressed into toroidal shaped samples ( $\varphi_{\text{out}}$ : 7.00 mm;  $\varphi_{\text{in}}$ : 3.04 mm).

Table S1 The comparison of the minimal  $R_L$  between magnetic materials and 3D architecture.

| Materials                            | $R_{L, \min}$ (dB) | C (wt%) | Reference |
|--------------------------------------|--------------------|---------|-----------|
| $\text{Fe}_3\text{O}_4/\text{ZnO}$   | -30.0              | 50      | 42        |
| $\text{Fe}_3\text{O}_4/\text{TiO}_2$ | -20.6              | 50      | 43        |
| $\text{Fe}_3\text{O}_4/\text{SnO}_2$ | -27.4              | 80      | 40        |
| $\text{Fe}_3\text{O}_4/\text{C}$     | -27.4              | 55      | 44        |
| 3D architecture                      | -31.9              | 20      | This work |

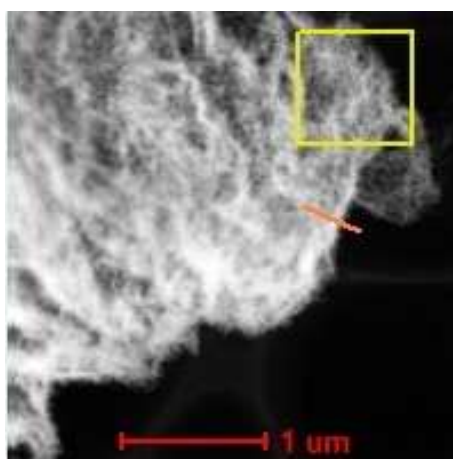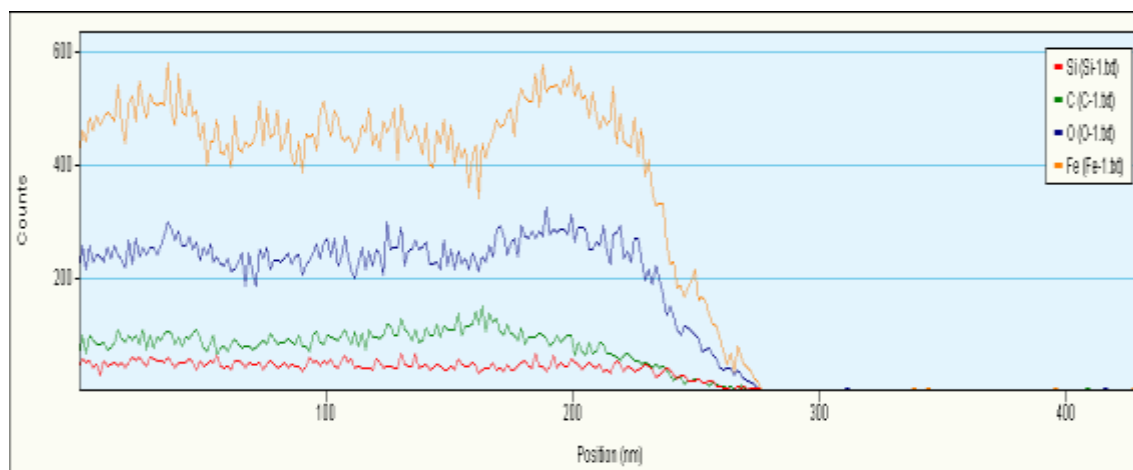

**Figure S1** HAADF-STEM image of 3D  $\text{SiO}_2@ \beta\text{-FeOOH}$  core/shell nanorod array/G architecture and Line scanning profiles along the red line in STEM image.

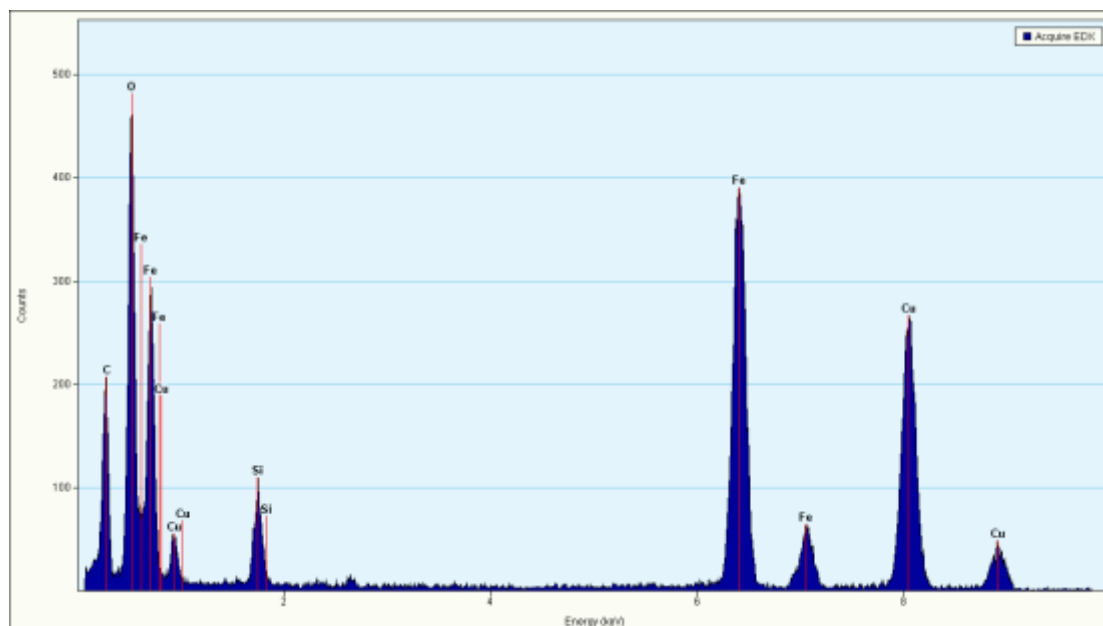

**Figure S2** EDX pattern of 3D SiO<sub>2</sub>@ $\beta$ -FeOOH core/shell nanorod array/G architecture

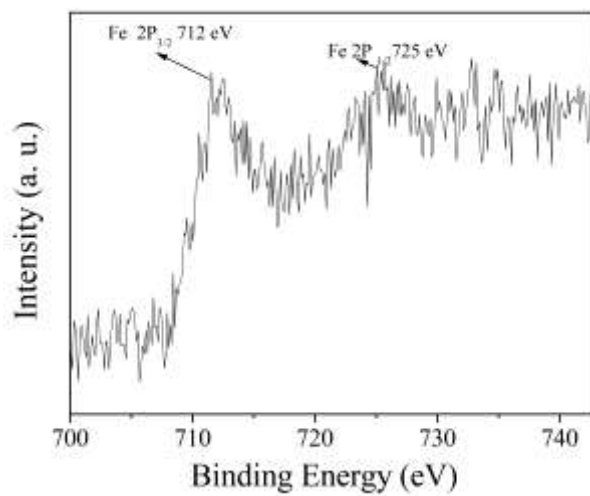

**Figure S3** Fe2p core level XPS spectrum of the D SiO<sub>2</sub>@Fe<sub>3</sub>O<sub>4</sub> core/shell nanorod array/G architecture

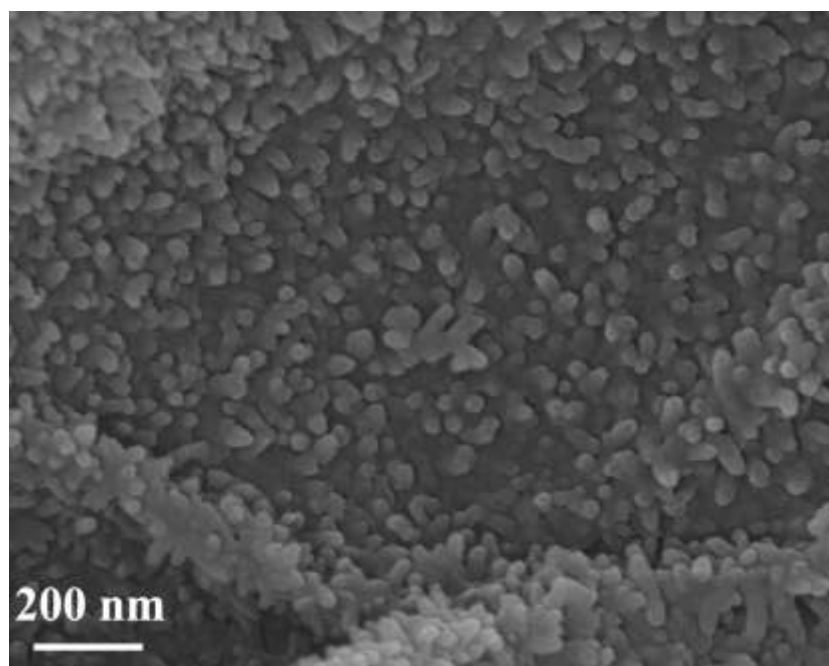

**Figure S4** SEM image of the D SiO<sub>2</sub>@Fe<sub>3</sub>O<sub>4</sub> core/shell nanorod array/G architecture

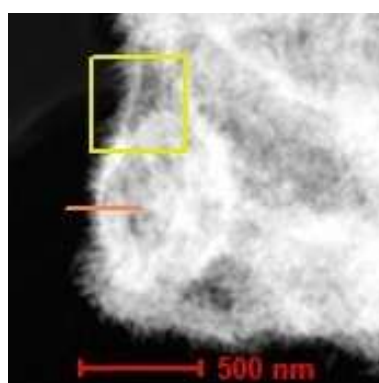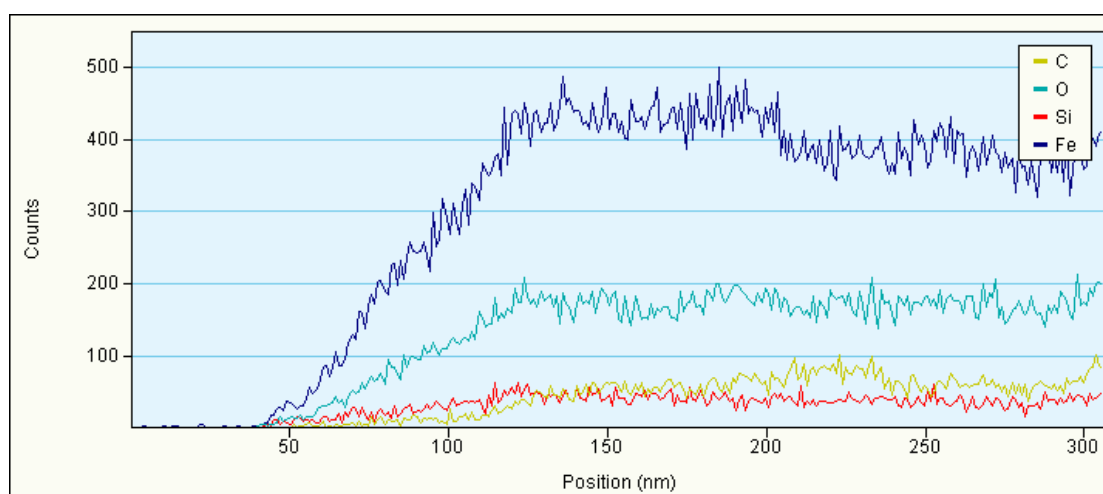

**Figure S5** HAADF-STEM image of the D SiO<sub>2</sub>@Fe<sub>3</sub>O<sub>4</sub> core/shell nanorod array/G architecture and Line scanning profiles along the red line in STEM image.

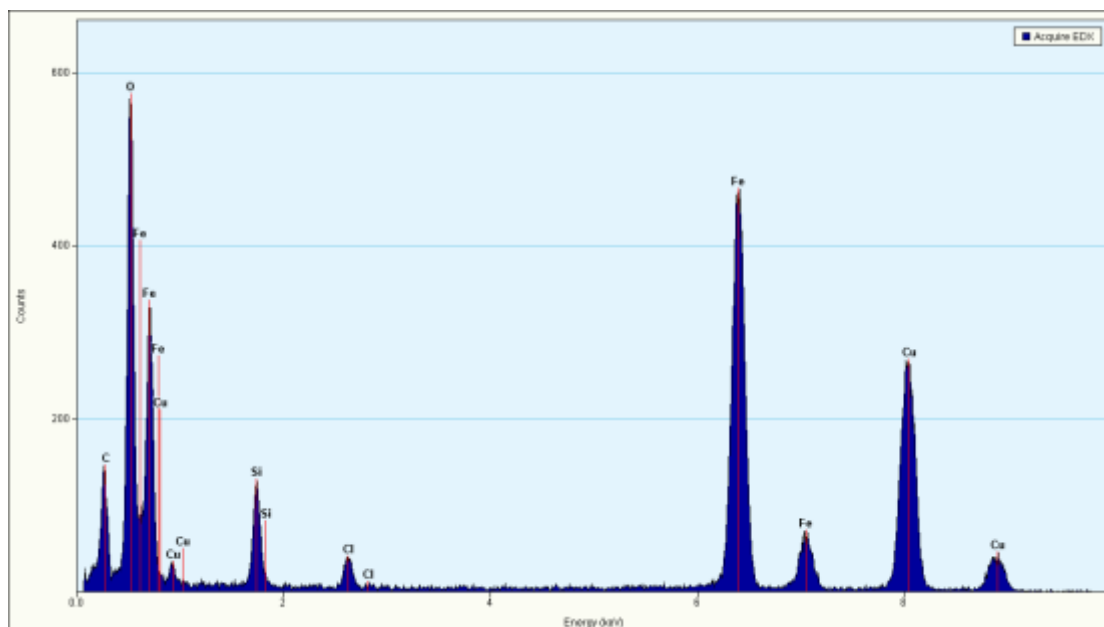

**Figure S6** EDX pattern of the D SiO<sub>2</sub>@Fe<sub>3</sub>O<sub>4</sub> core/shell nanorod array/G architecture

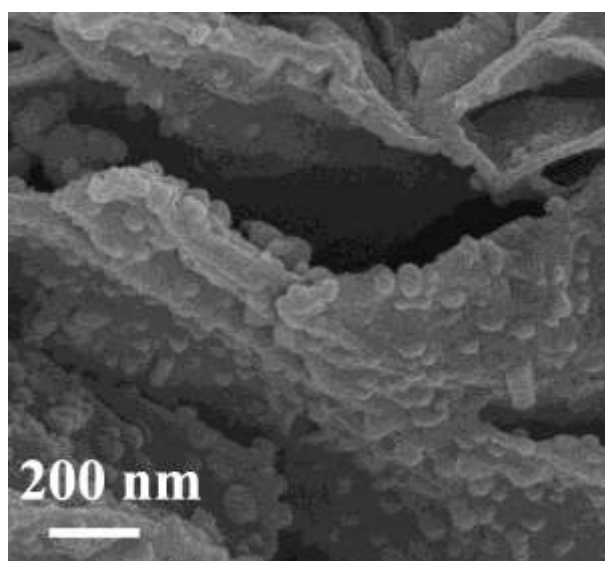

**Figure S7** SEM image of the product without SiO<sub>2</sub> coating

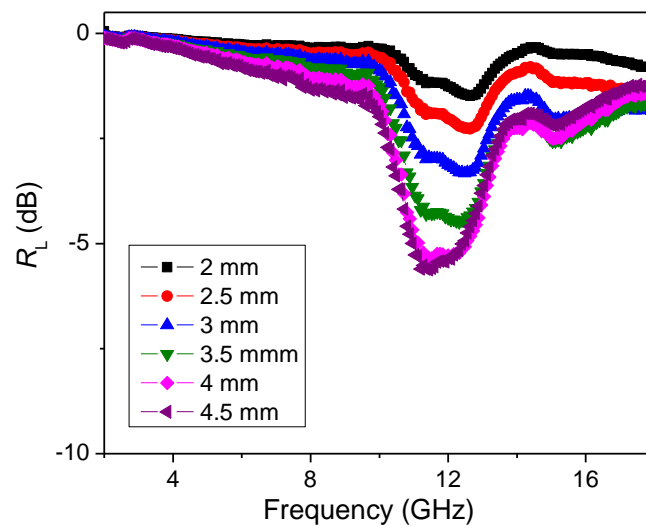

**Figure S8** The reflection losses of the pure  $\text{Fe}_3\text{O}_4$  nanorods

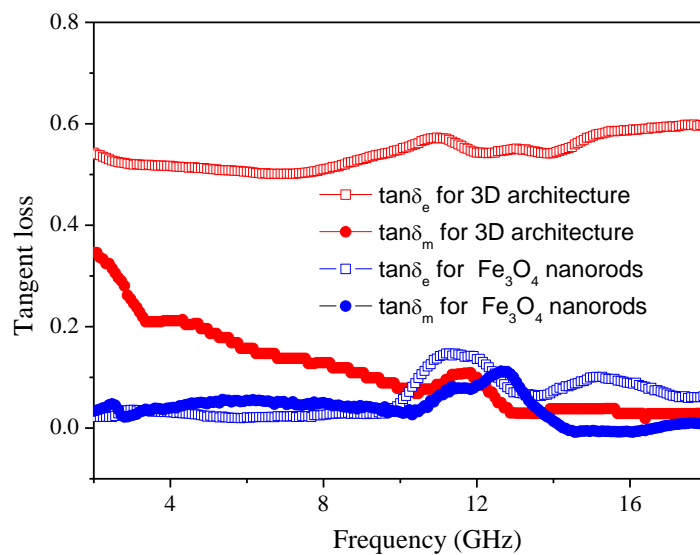

**Figure S9** The tangent losses for 3D architecture and the pure  $\text{Fe}_3\text{O}_4$  nanorods



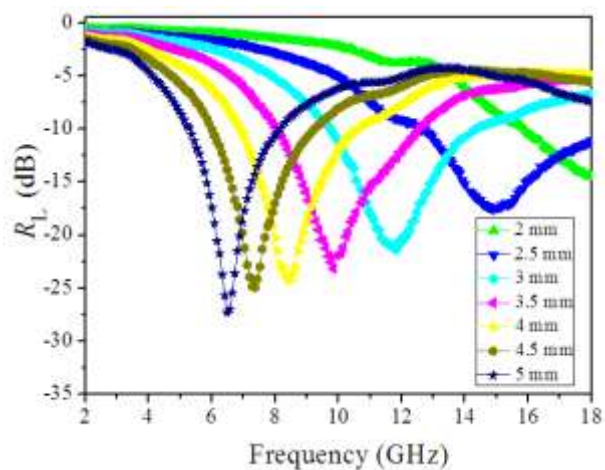

**Figure S10** The reflection losses of 3D architecture with low loading of  $\text{Fe}_3\text{O}_4$  nanorods

#### Notes and references

S1. W. S. Hummers and R. E. Offeman, *J. Am. Chem. Soc.*, 1958, **80**, 1339.
